# Supplementary material for: Comparison of two multi-trait association testing methods and sequence-based fine mapping of six additive QTL in Swiss Large White pigs
Source: PubMed Central journal article supplement (PMC10084639; doi:10.1186/s12864-023-09295-4), 2023-04-10

# Reproduction traits

## NBA

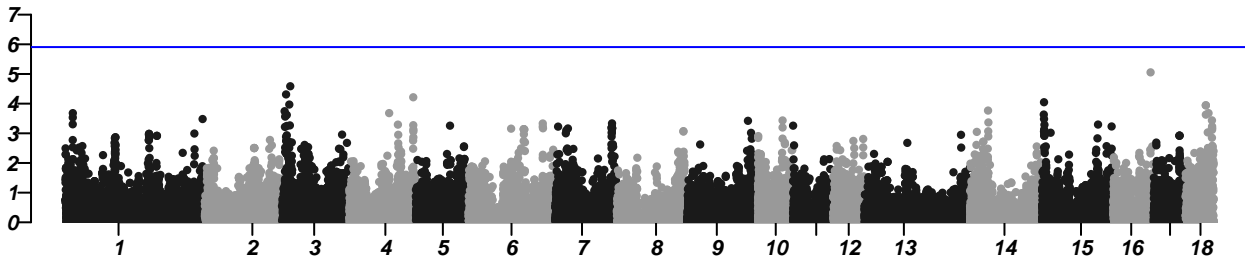

## PSP

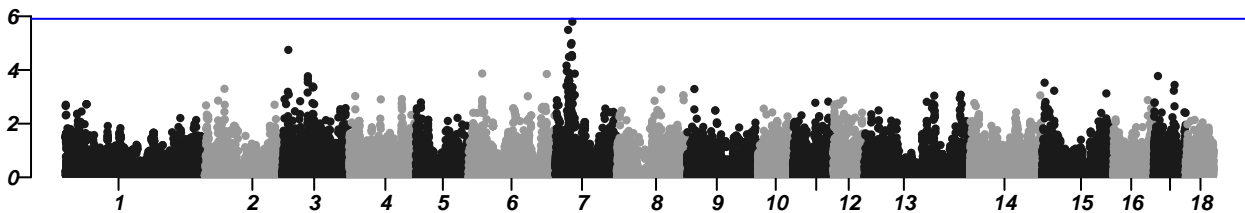

## PUP

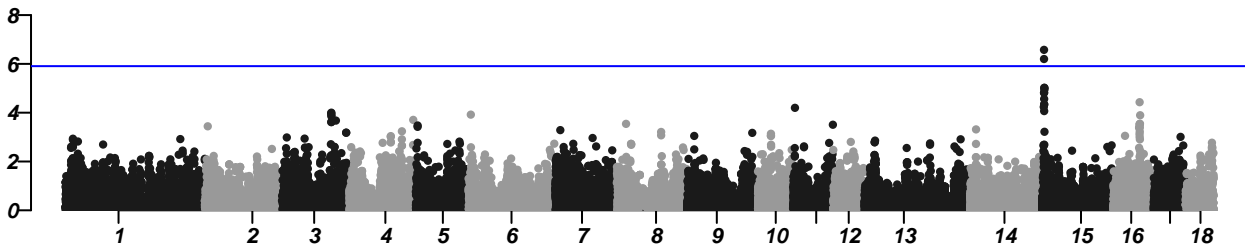

## GL

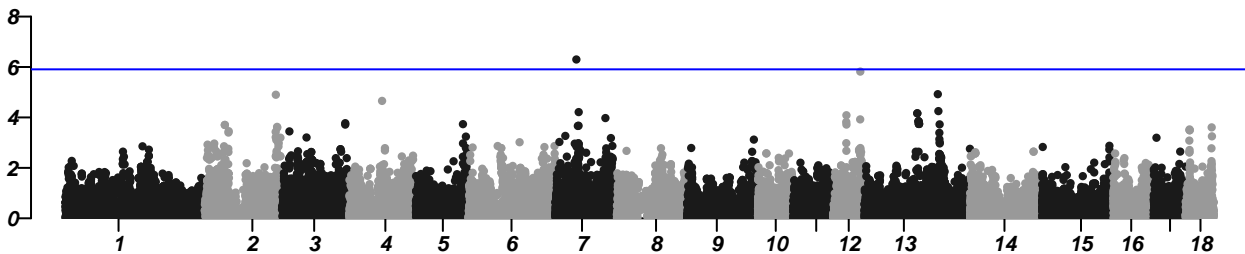

# Conformation traits

NT

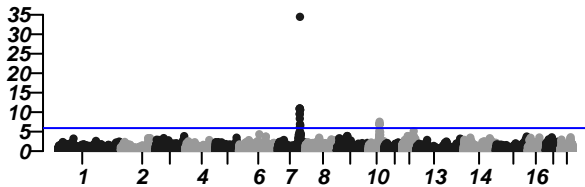

NIT

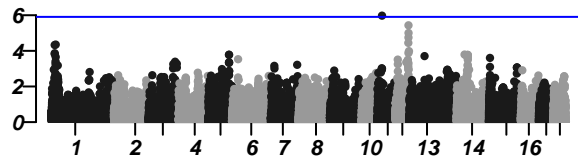

NUT

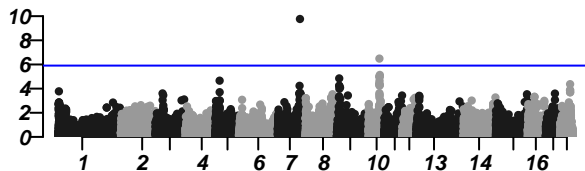

XOH

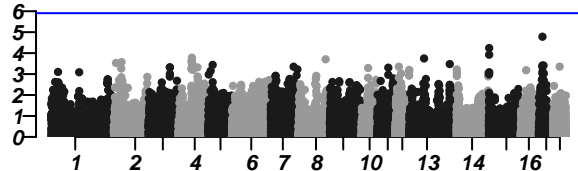

SCH

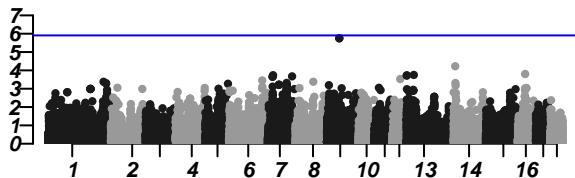

WSFH

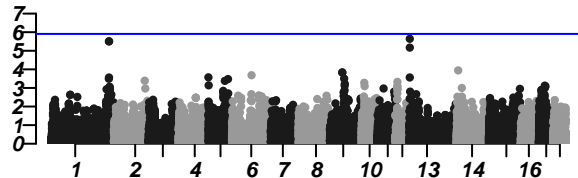

NEIH

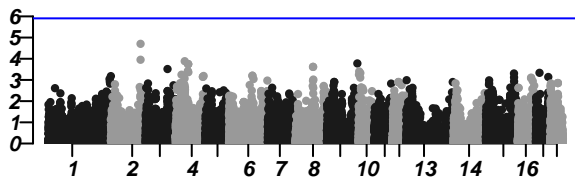

BFL

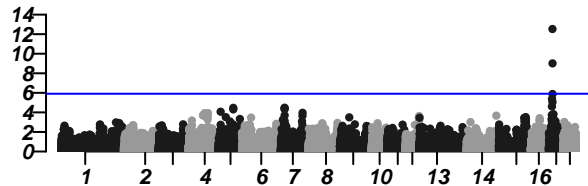

GAIT

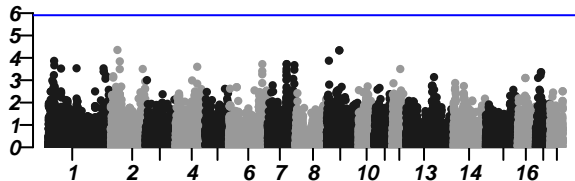

CL

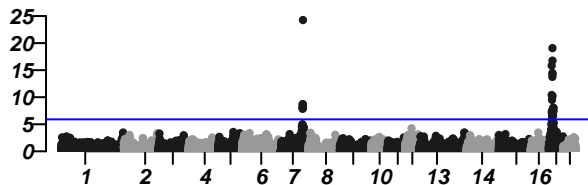

Production traits

DWG

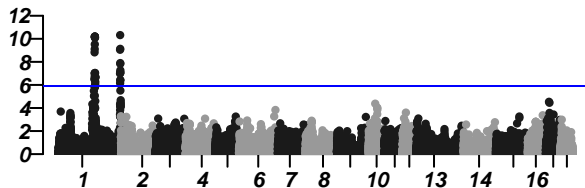

ADFI

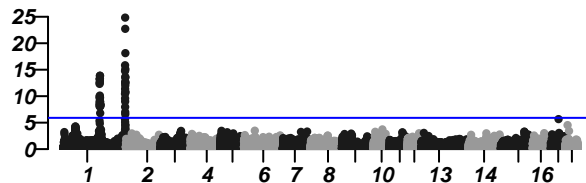

MAS

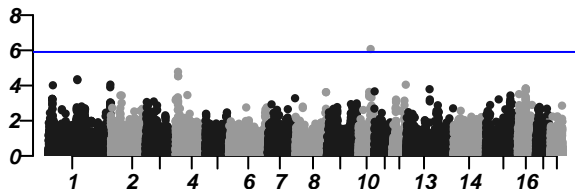

IMF

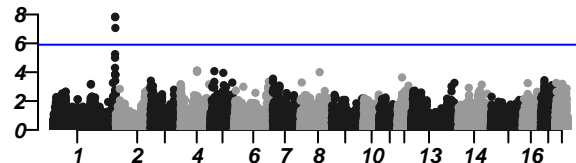

PH24

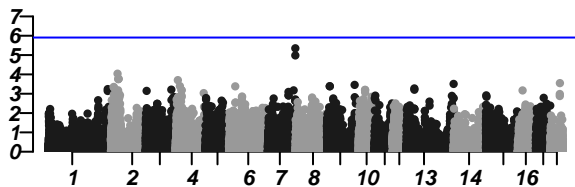

DRL

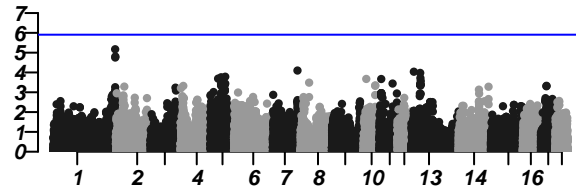

LDWG

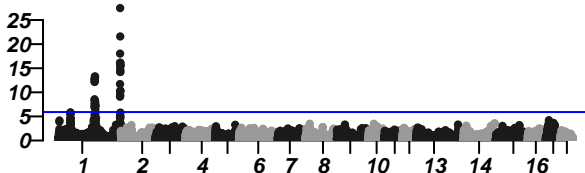

BFT

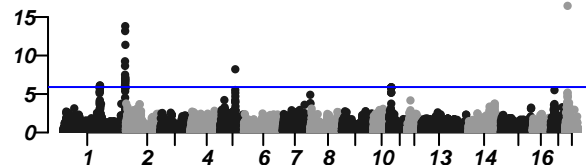

MT

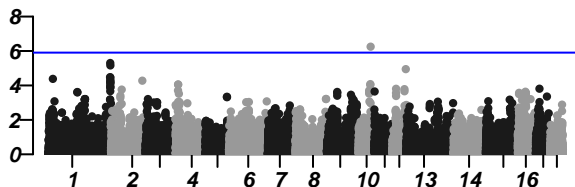

LMC

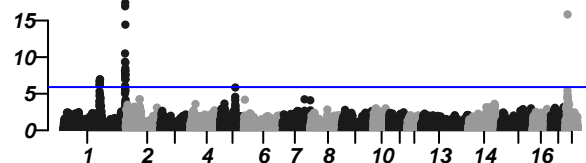

Supplement: 12864_2023_9295_MOESM2_ESM.pdf [file 12864_2023_9295_MOESM2_ESM.pdf]
