# Supplementary material for: Comparison of two multi-trait association testing methods and sequence-based fine mapping of six additive QTL in Swiss Large White pigs
Source: PubMed Central journal article supplement (PMC10084639; doi:10.1186/s12864-023-09295-4), 2023-04-10

Reproduction traits

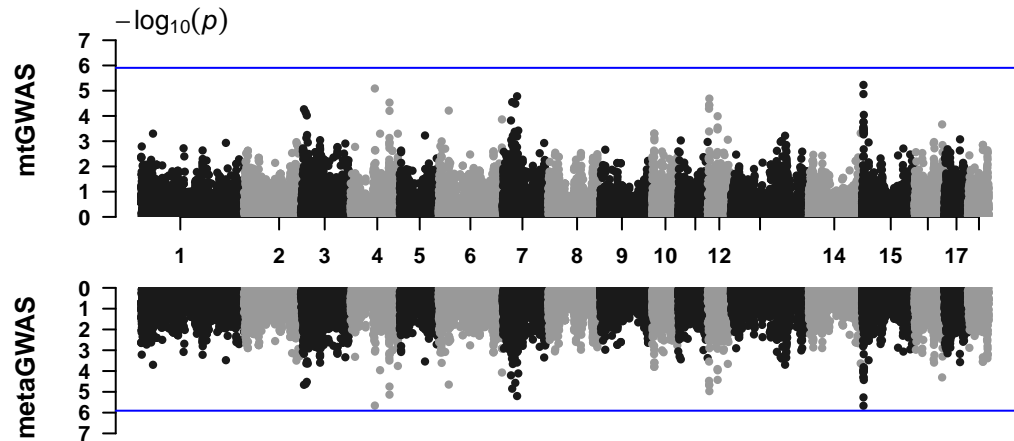

Conformation traits

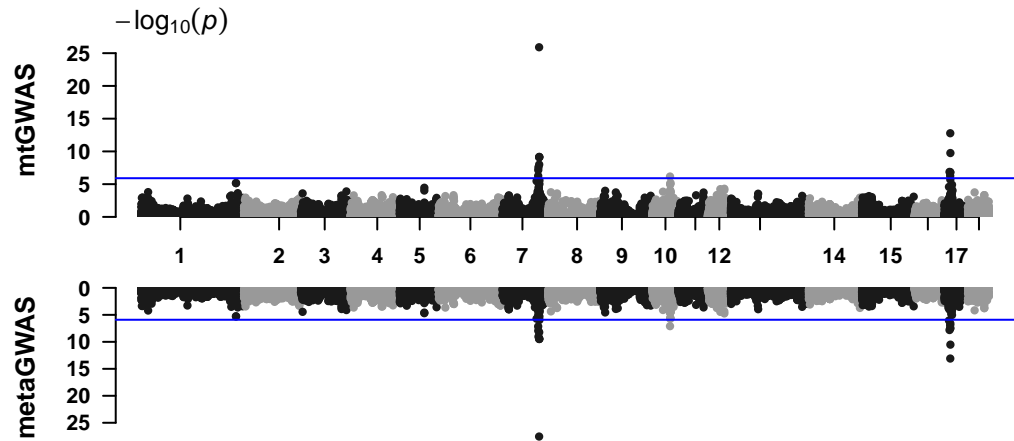

Production traits

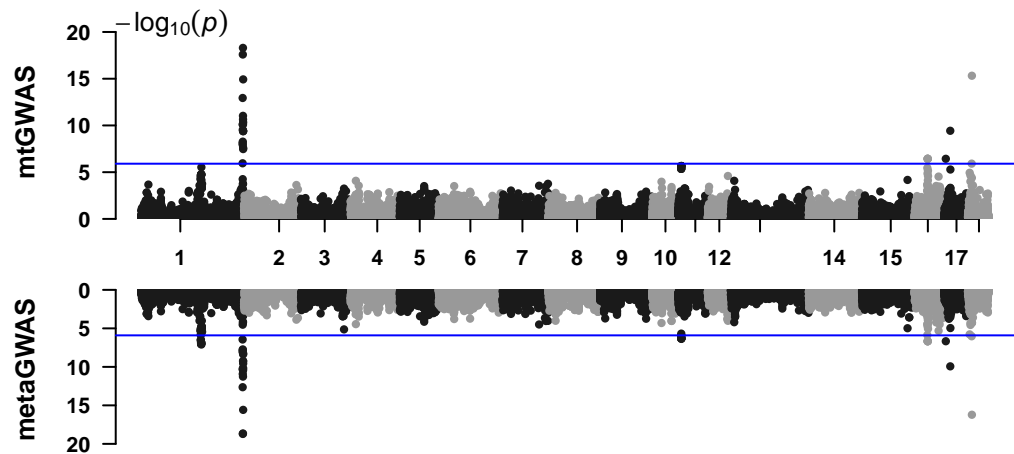

Altogether

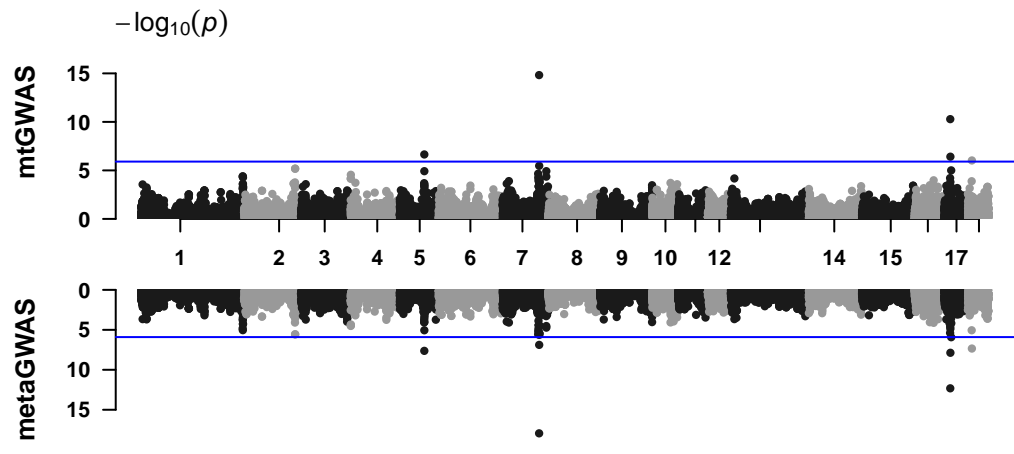

Supplement: 12864_2023_9295_MOESM4_ESM.pdf [file 12864_2023_9295_MOESM4_ESM.pdf]
